# Supplementary material for: Evidence That Calls-Based and Mobility Networks Are Isomorphic
Source: PubMed Central journal article supplement (PMC4695092; doi:10.1371/journal.pone.0145091), 2015-12-29
Supplement: pone.0145091.s001.pdf [file pone.0145091.s001.pdf]

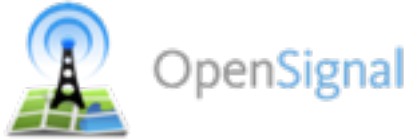

Date: April 27, 2015

**OpenSignal**  
155-157 Farringdon Road,  
London EC1R 3AD  
+44 (0) 845 834-0987

[james@opensignal.com](mailto:james@opensignal.com)

**Dear Sir or Madam,**

We authorise the author(s) of the paper to use our figure for publication under the CC-BY or CC0 license, whichever is deemed the most appropriate by the author(s) and/or the editor(s).

Regards,

James Robinson

CTO OpenSignal
