# Supplementary material for: Evidence That Calls-Based and Mobility Networks Are Isomorphic
Source: PLOS journal article supplement (doi:10.1371/journal.pone.0145091), 2015-12-29
Supplement: S2 (10.1371/journal.pone.0145091.s002) [file journal.pone.0145091.s002]

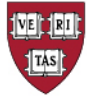

**HARVARD**

Human Research Protection Program

Harvard University-Area  
Committee on the Use of Human Subjects  
1414 Massachusetts Avenue, 2nd Floor  
Cambridge, MA 02138  
Federal Wide Assurance FWA00004837

**Notification of Initial Study Approval**

February 24, 2015

Ricardo Hausmann  
ricardo\_hausmann@harvard.edu

**Protocol Title:** Better understanding how the length and the monetary cost of commuting affect the economic prospects of populations housed in urban peripheries  
**Protocol #:** IRB15-0325  
**Funding Source:** None  
**IRB Review Date:** 2/24/2015  
**Effective Date:** 2/24/2015  
**Expiration Date:** 2/23/2016  
**IRB Review Type:** Expedited  
**IRB Review Action:** Approved

Dear Ricardo Hausmann:

On 2/24/2015, after review of your Initial Study, the Institutional Review Board (IRB) of the Harvard University-Area has approved the above-referenced submission. **Please note that the approval for this protocol will lapse on 2/23/2016.**

This approval includes the following:

- telefonica\_CUHS\_Protocol\_Template as at 02122015.doc (Protocol Documents) version: 0.01

Additionally, the IRB has reviewed the following documents:

- TISA-Harvard-MIT Collaboration Agrmt FULLY EXECUTED.pdf (Data Use Agreement or Other Agreements) version: 0.01
- Telefonica IT requirements.pdf (Other) version: 0.01

The IRB made the following determinations:

- Special Populations: Children
- Waivers: Waiver/alteration of the consent process,
- Risk Determination: No greater than minimal risk

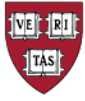

**HARVARD**

Human Research Protection Program

- Research Information Security Level: The research is classified, using Harvard's Data Security Policy, as Level 3 Data.

Please contact me at [cuhs@fas.harvard.edu](mailto:cuhs@fas.harvard.edu), or 617-496-2847 if you have any questions.

Sincerely,

Jeanne Freeman  
FAS IRB
